# Supplementary material for: Solvent-dependent assemblies, structure diversities and magnetic properties of two homochiral Co(ii)/Na(i) coordination polymers
Source: Royal Society of Chemistry journal article supplement (doi:10.1039/c4ra09263e), 2014-11-19
Supplement: c4ra09263e1.pdf [file c4ra09263e1.pdf]

## Supporting Information

### **Solvent-dependent assemblies, structure diversities and magnetic properties of two homochiral Co(II)/Na(I) coordination polymers**

Qipeng Li,<sup>a,b</sup> Xiang Jiang,<sup>c</sup> and Shaowu Du<sup>\*a</sup>

<sup>a</sup> State Key Laboratory of Structural Chemistry, Fujian Institute of Research on the Structure of Matter, Chinese Academy of Sciences, Fuzhou, Fujian 350002, PR China

<sup>b</sup> University of Chinese Academy of Sciences, Beijing 100039, PR China

<sup>c</sup> Department of Chemistry, Tsinghua University, Beijing 100084, P. R. China

**Table S1** Selected bond lengths (Å) and angles (°) for **S-1** and **S-2**

| <b>S-1</b> |             |                                       |             |
|------------|-------------|---------------------------------------|-------------|
| Co1—O4     | 2.069 (2)   | Na1—O1                                | 2.659 (3)   |
| Co1—O7     | 2.065 (2)   | Na1—O7 <sup>i</sup>                   | 2.697 (4)   |
| Co1—O1     | 2.089 (2)   | Na1—O2 <sup>ii</sup>                  | 2.828 (4)   |
| Co1—O6     | 2.087 (2)   | O2—Na1 <sup>iii</sup>                 | 2.828 (4)   |
| Co1—O5     | 2.114 (2)   | O7—Na1 <sup>iv</sup>                  | 2.697 (4)   |
| Co1—N1     | 2.165 (3)   |                                       |             |
| O4—Co1—O7  | 179.04 (11) | C2—O1—Co1                             | 116.2 (2)   |
| O4—Co1—O1  | 91.79 (11)  | C2—O1—Na1                             | 126.1 (2)   |
| O7—Co1—O1  | 87.81 (10)  | Co1—O1—Na1                            | 116.38 (13) |
| O4—Co1—O6  | 89.98 (10)  | C2—O2—Na1 <sup>iii</sup>              | 110.0 (2)   |
| O7—Co1—O6  | 89.33 (11)  | C4—O4—Co1                             | 116.7 (2)   |
| O1—Co1—O6  | 109.42 (10) | C6—O5—Co1                             | 113.6 (2)   |
| O4—Co1—O5  | 92.88 (11)  | Co1—O7—Na1 <sup>iv</sup>              | 122.49 (12) |
| O7—Co1—O5  | 87.81 (10)  | O5—Co1—N1                             | 79.83 (10)  |
| O1—Co1—O5  | 157.16 (10) | O1—Na1—O7 <sup>i</sup>                | 122.76 (13) |
| O6—Co1—O5  | 92.93 (10)  | O1—Na1—O2 <sup>ii</sup>               | 101.00 (12) |
| O4—Co1—N1  | 81.29 (9)   | O7 <sup>i</sup> —Na1—O2 <sup>ii</sup> | 114.90 (14) |
| O7—Co1—N1  | 99.49 (11)  | C3—N1—Co1                             | 108.06 (19) |
| O1—Co1—N1  | 78.82 (10)  | C1—N1—Co1                             | 106.05 (19) |
| O6—Co1—N1  | 168.29 (10) | C5—N1—Co1                             | 103.8 (2)   |

Symmetry codes: (i)  $x-1, y, z$ ; (ii)  $-x, y+1/2, -z+3/2$ ; (iii)  $-x, y-1/2, -z+3/2$ ; (iv)  $x+1, y, z$ .

| <b>S-2</b> |           |        |           |
|------------|-----------|--------|-----------|
| Co1—O1     | 2.050 (2) | Na1—O3 | 2.625 (4) |

|                         |             |                                         |             |
|-------------------------|-------------|-----------------------------------------|-------------|
| Co1—O4 <sup>i</sup>     | 2.075 (2)   | Na1—O5 <sup>ii</sup>                    | 2.722 (4)   |
| Co1—O2                  | 2.090 (2)   | Na1—O4 <sup>iii</sup>                   | 2.901 (4)   |
| Co1—O3                  | 2.095 (2)   | O4—Co1 <sup>iv</sup>                    | 2.075 (2)   |
| Co1—O6                  | 2.151 (2)   | O4—Na1 <sup>v</sup>                     | 2.901 (4)   |
| Co1—N1                  | 2.169 (3)   | O5—Na1 <sup>vi</sup>                    | 2.722 (4)   |
| O1—Co1—O4 <sup>i</sup>  | 93.82 (9)   | C1—N1—Co1                               | 107.0 (2)   |
| O1—Co1—O2               | 95.28 (10)  | C6—N1—Co1                               | 105.06 (19) |
| O4 <sup>i</sup> —Co1—O2 | 96.63 (9)   | C3—N1—Co1                               | 105.75 (19) |
| O1—Co1—O3               | 89.63 (10)  | C2—O1—Co1                               | 116.1 (2)   |
| O4 <sup>i</sup> —Co1—O3 | 104.17 (9)  | C9—O2—Co1                               | 115.7 (2)   |
| O2—Co1—O3               | 158.26 (9)  | C4—O3—Co1                               | 111.9 (2)   |
| O1—Co1—O6               | 176.52 (11) | C4—O3—Na1                               | 103.9 (2)   |
| O4 <sup>i</sup> —Co1—O6 | 86.07 (10)  | Co1—O3—Na1                              | 120.75 (12) |
| O2—Co1—O6               | 88.19 (10)  | C9—O4—Co1 <sup>iv</sup>                 | 124.7 (2)   |
| O3—Co1—O6               | 87.02 (10)  | C9—O4—Na1 <sup>v</sup>                  | 115.4 (2)   |
| O1—Co1—N1               | 81.57 (9)   | Co1 <sup>iv</sup> —O4—Na1 <sup>v</sup>  | 102.87 (11) |
| O4 <sup>i</sup> —Co1—N1 | 172.88 (10) | C2—O5—Na1 <sup>vi</sup>                 | 113.1 (2)   |
| O2—Co1—N1               | 78.49 (9)   | O3—Na1—O5 <sup>ii</sup>                 | 116.90 (13) |
| O3—Co1—N1               | 81.32 (10)  | O3—Na1—O4 <sup>iii</sup>                | 130.17 (13) |
| O6—Co1—N1               | 98.87 (10)  | O5 <sup>ii</sup> —Na1—O4 <sup>iii</sup> | 105.46 (12) |

Symmetry codes: (i)  $-x+2, y-1/2, -z+1/2$ ; (ii)  $x-1/2, -y+1/2, -z$ ; (iii)  $x, y-1, z$ ; (iv)  $-x+2, y+1/2, -z+1/2$ ; (v)  $x, y+1, z$ ; (vi)  $x+1/2, -y+1/2, -z$ .

**Table S2** Bond lengths (Å) and angles (°) of hydrogen bonds for **S-1**

| $D-H\cdots A$                     | $D-H$ | $H\cdots A$ | $D\cdots A$ | $D-H\cdots A$ |
|-----------------------------------|-------|-------------|-------------|---------------|
| O6-H6C $\cdots$ O3 <sup>iii</sup> | 0.90  | 2.25        | 2.7993      | 119           |
| O6-H6D $\cdots$ O2 <sup>ii</sup>  | 0.90  | 2.16        | 2.7498      | 122           |
| O7-H7D $\cdots$ O3 <sup>i</sup>   | 0.90  | 2.14        | 2.7148      | 121           |

Symmetry codes: (i)  $1/2-x, -y, 1/2+z$ ; (ii)  $-x, 1/2+y, 3/2-z$ ; (iii)  $1/2+x, 1/2-y, 1-z$ .

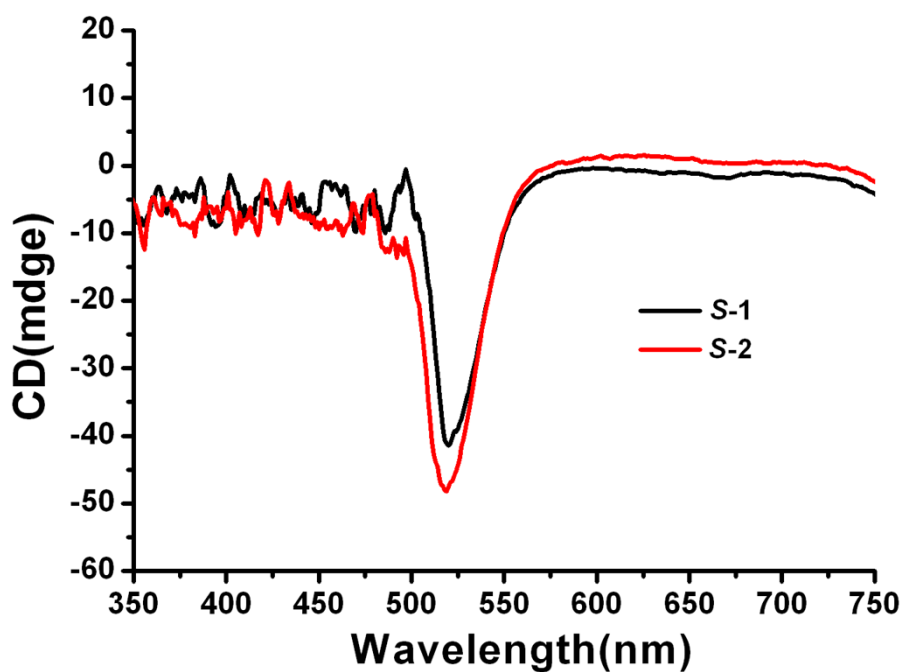

Fig. S1 The solid-state CD spectra of *S-1* and *S-2*.

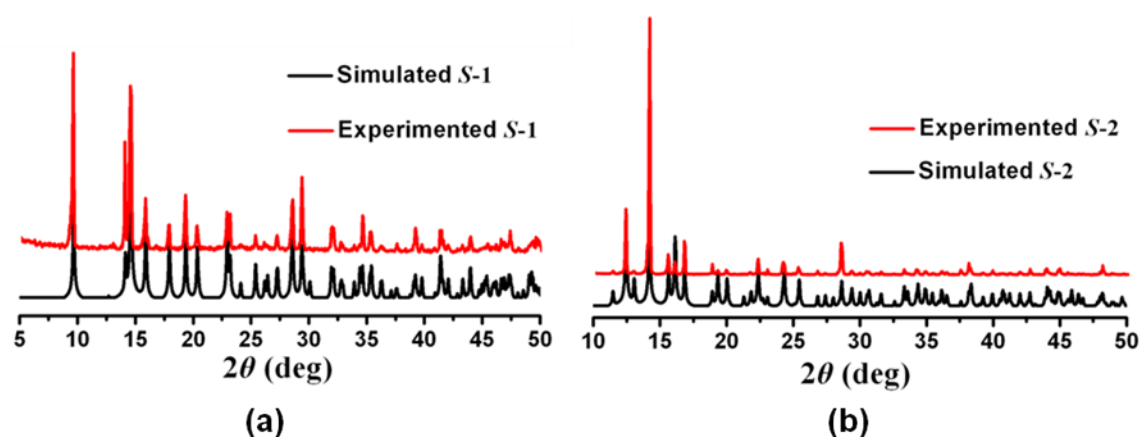

Fig. S2 X-ray powder diffraction (XRPD) patterns of *S-1* and *S-2*

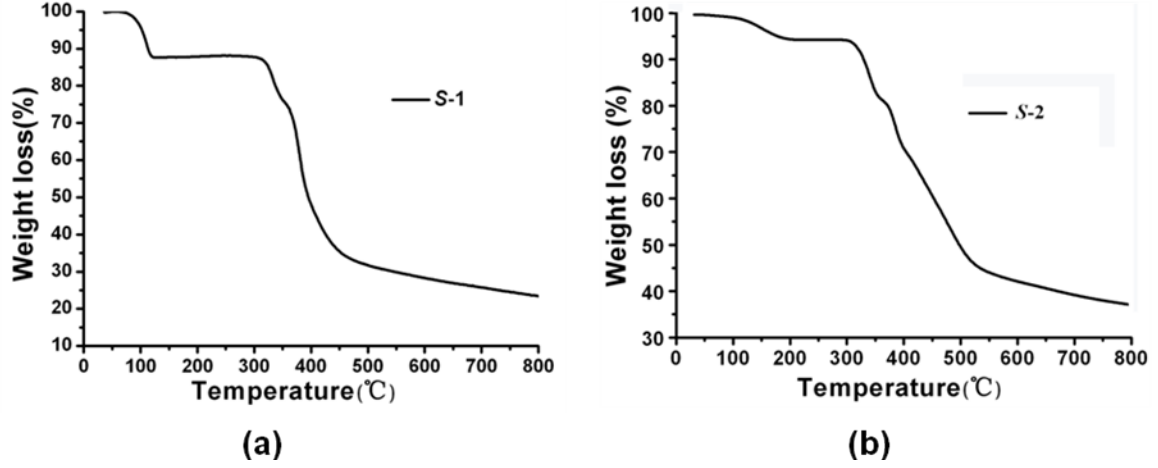

Fig. S3 View of the TGA curves of S-1 and S-2

For S-1:

$$\hat{H} = D \left[ \hat{S}_z^2 - \frac{1}{3} S(S+1) \right] + g_{\parallel} \beta H_z S_z + g_{\perp} \beta (H_x S_x + H_y S_y)$$

The expressions of the molar magnetic susceptibility ( $\chi_m$ ) can be derived from the above Hamiltonian, where N is Avogadro's number,  $\beta$  is the Bohr magneton,  $k$  is Boltzmann's constant,  $g$  is the Landé g-factor and  $D$  is the zero-field splitting.

$$\chi_{\parallel} = \frac{N g_{\parallel}^2 \beta^2}{kT} \times \frac{1 + 9e^{-2D/kT}}{4(1 + e^{-2D/kT})}$$

$$\chi_{\perp} = \frac{N g_{\perp}^2 \beta^2}{kT} \times \frac{4 + (3kT / D)(1 - e^{-2D/kT})}{4(1 + e^{-2D/kT})}$$

$$\chi_m = \frac{\chi_{\parallel} + 2\chi_{\perp}}{3}$$
